# Supplementary material for: Overland movement in African clawed frogs (Xenopus laevis): empirical dispersal data from within their native range
Source: PeerJ. 2017 Nov 10;5:e4039. doi: 10.7717/peerj.4039 (PMC5683045; doi:10.7717/peerj.4039)
Supplement: Supplemental Information 1 — Each entry contains the tag number of the individualXenopus laevis, the date and place of first capture (with Latitude and Longitude) termed “From” and the next place captured, date (with Latitude and Longitude) termed “To”. Note that individuals may have been captured many time at a site so that the date on which they arrived may differ from the date they were last found there. [file peerj-05-4039-s001.csv]

Species	PIT Tag	SVL	Sex	From	Latitude_From	Longitude_From	Date_From	To	Latitude_To	Longitude_To	Date_To	Distance (m)
Xenopus laevis	900108001426728	77.55644	m	Arabella2 agterbome	-34.321850	19.122907	13.10.2015	Arabella 2	-34.321850	19.122907	08.11.2015	91
Xenopus laevis	900108001427423	116.28918	f	Arabella2 agterbome	-34.321850	19.122907	13.10.2015	Arabella 2	-34.321850	19.122907	09.11.2015	91
Xenopus laevis	900108001427491	77.89188	m	Arabella 2	-34.321850	19.122907	15.10.2015	Arabella2 agterbome	-34.321850	19.122907	17.10.2015	91
Xenopus laevis	972273000275447	76.23767	m	Arabella 2	-34.321850	19.122907	15.10.2015	Arabella2 agterbome	-34.321850	19.122907	17.10.2015	91
Xenopus laevis	972273000275602	101.29316	f	Arabella 2	-34.321850	19.122907	15.10.2015	Arabella2 agterbome	-34.321850	19.122907	13.10.2015	91
Xenopus laevis	972273000275967	75.61683	f	Arabella 2	-34.321850	19.122907	15.10.2015	Arabella2 agterbome	-34.321850	19.122907	17.10.2015	91
Xenopus laevis	900108001426252	86.3817	f	Agter Koffieklip	-34.333132	19.085057	17.09.2015	Koffieklip	-34.333299	19.084023	05.09.2016	95
Xenopus laevis	972273000275407	64.69008	f	Arabella Pond	ÿ-34.321131	19.122663	28.07.2015	Arabella2 agterbome	-34.321850	19.122907	13.10.2015	95
Xenopus laevis	972273000275407	64.69008	f	Arabella 2	-34.321850	19.122907	15.10.2015	Arabella Pond	ÿ-34.321131	19.122663	28.07.2015	96
Xenopus laevis	900108001426396	59.50174	f	Lang gat	-34.326300	19.096403	09.12.2014	Rondegat	ÿ-34.326677	19.098038	2015/02/10	147.73
Xenopus laevis	972273000275026	57.76705	f	Rondegat	ÿ-34.326677	19.098038	10.02.2015	Lang gat	-34.326300	19.096403	12.07.2015	147.73
Xenopus laevis	972273000275108	92.60962	f	Lang gat	-34.326300	19.096403	10.12.2014	Rondegat	ÿ-34.326677	19.098038	10.02.2015	147.73
Xenopus laevis	972273000275116	57.46856	f	Rondegat	ÿ-34.326677	19.098038	10.02.2015	Lang gat	-34.326300	19.096403	13.10.2015	147.73
Xenopus laevis	972273000275139	70.09248	f	Rondegat	ÿ-34.326677	19.098038	10.02.2015	Lang gat	-34.326300	19.096403	13.04.2015	147.73
Xenopus laevis	972273000275157	55.54803	m	Rondegat	ÿ-34.326677	19.098038	10.02.2015	Lang gat	-34.326300	19.096403	23.08.2015	147.73
Xenopus laevis	972273000275217	57.12556	m	Rondegat	ÿ-34.326677	19.098038	11.02.2015	Lang gat	-34.326300	19.096403	15.04.2015	147.73
Xenopus laevis	972273000275241	72.29256	f	Rondegat	ÿ-34.326677	19.098038	10.02.2015	Lang gat	-34.326300	19.096403	26.06.2015	147.73
Xenopus laevis	972273000275282	50.58599	m	Rondegat	ÿ-34.326677	19.098038	10.02.2015	Lang gat	-34.326300	19.096403	14.09.2015	147.73
Xenopus laevis	972273000275393	51.50527	f	Rondegat	ÿ-34.326677	19.098038	11.02.2015	Lang gat	-34.326300	19.096403	25.08.2015	147.73
Xenopus laevis	972273000275428	73.67329	f	Lang gat	-34.326300	19.096403	18.08.2014	Rondegat	ÿ-34.326677	19.098038	10.02.2015	147.73
Xenopus laevis	972273000275428	73.67329	f	Rondegat	ÿ-34.326677	19.098038	10.02.2015	Lang gat	-34.326300	19.096403	05.08.2015	147.73
Xenopus laevis	972273000275500	63.34981	m	Rondegat	ÿ-34.326677	19.098038	10.02.2015	Lang gat	-34.326300	19.096403	25.06.2015	147.73
Xenopus laevis	972273000275517	64.90056	m	Rondegat	ÿ-34.326677	19.098038	10.02.2015	Lang gat	-34.326300	19.096403	11.10.2015	147.73
Xenopus laevis	972273000275584	76.3901	f	Rondegat	ÿ-34.326677	19.098038	11.02.2015	Lang gat	-34.326300	19.096403	16.09.2015	147.73
Xenopus laevis	972273000275595	64.79433	f	Rondegat	ÿ-34.326677	19.098038	11.02.2015	Lang gat	-34.326300	19.096403	27.06.2015	147.73
Xenopus laevis	972273000275648	53.81875	f	Rondegat	ÿ-34.326677	19.098038	10.02.2015	Lang gat	-34.326300	19.096403	11.10.2015	147.73
Xenopus laevis	972273000275670	67.62438	f	Rondegat	ÿ-34.326677	19.098038	19.08.2015	Lang gat	-34.326300	19.096403	20.08.2015	147.73
Xenopus laevis	972273000275674	71.57947	f	Rondegat	ÿ-34.326677	19.098038	10.02.2015	Lang gat	-34.326300	19.096403	25.06.2015	147.73
Xenopus laevis	972273000275704	60.53314	f	Rondegat	ÿ-34.326677	19.098038	11.02.2015	Lang gat	-34.326300	19.096403	15.04.2015	147.73
Xenopus laevis	972273000275705	52.93998	f	Rondegat	ÿ-34.326677	19.098038	10.02.2015	Lang gat	-34.326300	19.096403	05.08.2015	147.73
Xenopus laevis	972273000275712	70.67938	f	Rondegat	ÿ-34.326677	19.098038	11.02.2015	Lang gat	-34.326300	19.096403	14.10.2015	147.73
Xenopus laevis	972273000275788	67.35654	f	Lang gat	-34.326300	19.096403	10.12.2014	Rondegat	ÿ-34.326677	19.098038	2015/02/10	147.73
Xenopus laevis	972273000275819	60.36639	f	Rondegat	ÿ-34.326677	19.098038	10.02.2015	Lang gat	-34.326300	19.096403	25.06.2015	147.73
Xenopus laevis	972273000275878	63.11212	f	Rondegat	ÿ-34.326677	19.098038	11.02.2015	Lang gat	-34.326300	19.096403	16.04.2015	147.73
Xenopus laevis	972273000275991	63.60315	m	Rondegat	ÿ-34.326677	19.098038	10.02.2015	Lang gat	-34.326300	19.096403	05.08.2015	147.73
Xenopus laevis	972273000275999	57.09667	m	Rondegat	ÿ-34.326677	19.098038	11.02.2015	Lang gat	-34.326300	19.096403	25.08.2015	147.73
Xenopus laevis	900108001426768	64.91709	f	Horse 2	-34.330394	19.096690	12.02.2015	Horse 3	-34.329490	19.099329	16.07.2015	249
Xenopus laevis	934000090003200	70.92347	f	Horse 3	-34.329490	19.099329	07.07.2014	Horse 2	-34.330394	19.096690	11.09.2014	249
Xenopus laevis	934000090003335	106.81111	f	Horse 3	-34.329490	19.099329	10.06.2014	Horse 2	-34.330394	19.096690	11.09.2014	249
Xenopus laevis	934000090003404	54.10879	m	Horse 3	-34.329490	19.099329	11.03.2015	Horse 2	-34.330394	19.096690	07.04.2015	249
Xenopus laevis	934000090003416	102.83166	f	Horse 2	-34.330394	19.096690	16.08.2014	Horse 3	-34.329490	19.099329	16.12.2014	249
Xenopus laevis	934000090003425	51.69824	f	Horse 2	-34.330394	19.096690	26.09.2014	Horse 3	-34.329490	19.099329	08.03.2015	249
Xenopus laevis	934000090003436	51.89388	f	Horse 2	-34.330394	19.096690	16.08.2014	Horse 3	-34.329490	19.099329	24.09.2014	249
Xenopus laevis	934000090003449	55.956123	f	Horse 3	-34.329490	19.099329	10.02.2015	Horse 2	-34.330394	19.096690	23.08.2015	249
Xenopus laevis	934000090003497	54.81773	f	Horse 2	-34.330394	19.096690	31.07.2014	Horse 3	-34.329490	19.099329	14.11.2014	249
Xenopus laevis	934000090003497	54.81773	f	Horse 3	-34.329490	19.099329	12.06.2014	Horse 2	-34.330394	19.096690	09.07.2014	249
Xenopus laevis	934000090003508	65.8048	f	Horse 3	-34.329490	19.099329	10.02.2015	Horse 2	-34.330394	19.096690	09.11.2015	249
Xenopus laevis	934000090003575	63.36678	f	Horse 3	-34.329490	19.099329	10.06.2014	Horse 2	-34.330394	19.096690	06.07.2014	249
Xenopus laevis	934000090003730	52.53734	m	Horse 3	-34.329490	19.099329	31.07.2014	Horse 2	-34.330394	19.096690	30.10.2014	249
Xenopus laevis	972273000275281	61.94675	f	Horse 2	-34.330394	19.096690	15.10.2015	Horse 3	-34.329490	19.099329	17.06.2016	249
Xenopus laevis	972273000275358	55.04269	f	Horse 2	-34.330394	19.096690	11.09.2014	Horse 3	-34.329490	19.099329	12.12.2014	249
Xenopus laevis	972273000275786	54.73826	f	Horse 2	-34.330394	19.096690	30.07.2014	Horse 3	-34.329490	19.099329	31.07.2014	249
Xenopus laevis	972273000275786	54.73826	f	Horse 2	-34.330394	19.096690	16.08.2014	Horse 3	-34.329490	19.099329	17.08.2014	249
Xenopus laevis	972273000275786	54.73826	f	Horse 3	-34.329490	19.099329	29.07.2014	Horse 2	-34.330394	19.096690	30.07.2014	249
Xenopus laevis	972273000275786	54.73826	f	Horse 3	-34.329490	19.099329	31.07.2014	Horse 2	-34.330394	19.096690	16.08.2014	249
Xenopus laevis	972273000275931	53.45157	f	Horse 2	-34.330394	19.096690	28.09.2014	Horse 3	-34.329490	19.099329	14.01.2015	249
Xenopus laevis	972273000275944	59.98957	m	Horse 3	-34.329490	19.099329	16.06.2015	Horse 2	-34.330394	19.096690	03.05.2016	249
Xenopus laevis	972273000349029	64.55001	m	Horse 3	-34.329490	19.099329	08.04.2015	Horse 2	-34.330394	19.096690	06.05.2015	249
Xenopus laevis	972273000349183	68.60002	f	Horse 3	-34.329490	19.099329	14.05.2015	Horse 2	-34.330394	19.096690	14.08.2015	249
Xenopus laevis	972273000349652	48.70892	m	Horse 2	-34.330394	19.096690	16.09.2015	Horse 3	-34.329490	19.099329	20.04.2016	249
Xenopus laevis	900108001427464	50.80942	f	Rondegat	ÿ-34.326677	19.098038	13.10.2015	Horse 3	-34.329490	19.099329	25.12.2016	344.87
Xenopus laevis	900108001701344	69.57712	f	Rondegat	ÿ-34.326677	19.098038	14.10.2015	Horse 3	-34.329490	19.099329	08.12.2015	344.87
Xenopus laevis	972273000275108	92.60962	f	Horse 3	-34.329490	19.099329	20.08.2015	Rondegat	ÿ-34.326677	19.098038	13.10.2015	344.87
Xenopus laevis	972273000275108	92.60962	f	Rondegat	ÿ-34.326677	19.098038	11.02.2015	Horse 3	-34.329490	19.099329	11.03.2015	344.87
Xenopus laevis	972273000275211	110.159	f	Horse 3	-34.329490	19.099329	28.01.2016	Rondegat	ÿ-34.326677	19.098038	13.05.2016	344.87
Xenopus laevis	972273000275428	73.67329	f	Horse 3	-34.329490	19.099329	29.07.2015	Rondegat	ÿ-34.326677	19.098038	14.10.2015	344.87
Xenopus laevis	972273000275428	73.67329	f	Rondegat	ÿ-34.326677	19.098038	11.02.2015	Horse 3	-34.329490	19.099329	08.04.2015	344.87
Xenopus laevis	972273000275571	40.08805	f	Rondegat	ÿ-34.326677	19.098038	11.02.2015	Horse 3	-34.329490	19.099329	27.08.2015	344.87
Xenopus laevis	972273000275714	51.36473	f	Horse 3	-34.329490	19.099329	10.02.2015	Lang gat	-34.326300	19.096403	11.10.2015	344.87
Xenopus laevis	972273000349213	73.13475	m	Rondegat	ÿ-34.326677	19.098038	13.10.2015	Horse 3	-34.329490	19.099329	06.12.2015	344.87
Xenopus laevis	972273000349544	59.6054	f	Rondegat	ÿ-34.326677	19.098038	13.10.2015	Horse 3	-34.329490	19.099329	06.12.2015	344.87
Xenopus laevis	972273000349734	70.83154	m	Rondegat	ÿ-34.326677	19.098038	13.10.2015	Horse 3	-34.329490	19.099329	16.04.2016	344.87
Xenopus laevis	900108001426033	102.37734	f	Lamloch	-34.330079	19.082633	15.10.2015	Koffieklip	-34.333299	19.084023	01.11.2016	384
Xenopus laevis	900108001426085	49.36642	f	Koffieklip	-34.333299	19.084023	09.09.2014	Lamloch	-34.330079	19.082633	2016/10/01	384
Xenopus laevis	900108001426369	85.69852	f	Koffieklip	-34.333299	19.084023	29.07.2014	Lamloch	-34.330079	19.082633	30.07.2014	384
Xenopus laevis	900108001426643	58.88588	m	Lamloch	-34.330079	19.082633	11.12.2014	Koffieklip	-34.333299	19.084023	23.02.2015	384
Xenopus laevis	900108001426669	45.84261	m	Lamloch	-34.330079	19.082633	09.12.2014	Koffieklip	-34.333299	19.084023	19.02.2015	384
Xenopus laevis	900108001427426	74.49084	f	Koffieklip	-34.333299	19.084023	09.09.2014	Lamloch	-34.330079	19.082633	19.10.2014	384
Xenopus laevis	900108001427462	73.37686	m	Koffieklip	-34.333299	19.084023	26.09.2014	Lamloch	-34.330079	19.082633	22.11.2014	384
Xenopus laevis	972273000275170	61.51316	f	Koffieklip	-34.333299	19.084023	27.09.2014	Lamloch	-34.330079	19.082633	24.11.2014	384
Xenopus laevis	972273000275170	61.51316	f	Lamloch	-34.330079	19.082633	31.07.2014	Koffieklip	-34.333299	19.084023	24.08.2014	384
Xenopus laevis	972273000275271	43.29803	f	Lamloch	-34.330079	19.082633	11.12.2014	Koffieklip	-34.333299	19.084023	07.04.2015	384
Xenopus laevis	972273000275320	59.91254	m	Horse 2	-34.330394	19.096690	17.08.2014	Lang gat	-34.326300	19.096403	23.10.2014	422
Xenopus laevis	972273000275829	51.51411	m	Horse 2	-34.330394	19.096690	11.09.2014	Lang gat	-34.326300	19.096403	11.12.2014	422
Xenopus laevis	972273000275977	66.47031	f	Lang gat	-34.326300	19.096403	31.07.2014	Horse 3	-34.329490	19.099329	12.03.2015	438
Xenopus laevis	972273000275211	110.159	f	Horse 3	-34.329490	19.099329	10.02.2015	Lang gat	-34.326300	19.096403	12.07.2015	438.63
Xenopus laevis	972273000275608	67.60247	m	Horse 3	-34.329490	19.099329	10.02.2015	Lang gat	-34.326300	19.096403	25.06.2015	438.63
Xenopus laevis	972273000275608	67.60247	m	Lang gat	-34.326300	19.096403	16.09.2015	Horse 3	-34.329490	19.099329	05.11.2015	438.63
Xenopus laevis	972273000275714	51.36473	f	Rondegat	ÿ-34.326677	19.098038	14.10.2015	Horse 3	-34.329490	19.099329	15.03.2016	438.63
Xenopus laevis	972273000275845	52.85854	f	Horse 3	-34.329490	19.099329	19.08.2015	Lang gat	-34.326300	19.096403	09.07.2016	438.63
Xenopus laevis	972273000275857	63.31187	m	Horse 3	-34.329490	19.099329	10.02.2015	Lang gat	-34.326300	19.096403	13.10.2015	438.63
Xenopus laevis	972273000275912	79.06996	f	Horse 3	-34.329490	19.099329	11.02.2015	Lang gat	-34.326300	19.096403	13.10.2015	438.63
Xenopus laevis	972273000275939	55.03314	f	Horse 3	-34.329490	19.099329	28.07.2015	Lang gat	-34.326300	19.096403	15.08.2016	438.63
Xenopus laevis	972273000275961	62.97835	f	Horse 3	-34.329490	19.099329	29.07.2015	Lang gat	-34.326300	19.096403	13.09.2016	438.63
Xenopus laevis	972273000275670	67.62438	f	Horse 2	-34.330394	19.096690	12.03.2015	Rondegat	ÿ-34.326677	19.098038	19.08.2015	441
Xenopus laevis	900108001427488	51.89865	m	Lang gat	-34.326300	19.096403	28.09.2014	Horse 2	-34.330394	19.096690	12.03.2015	447
Xenopus laevis	972273000275274	78.91087	f	Lang gat	-34.326300	19.096403	29.07.2014	Horse 2	-34.330394	19.096690	12.03.2015	447
Xenopus laevis	900108001427504	81.6677	f	Ysterklip	-34.318964	19.118726	09.12.2014	Arabella 2	-34.321850	19.122907	20.02.2015	518
Xenopus laevis	934000090003293	70.66015	f	Arabella 2	-34.321850	19.122907	27.09.2014	Ysterklip	-34.318964	19.118726	19.04.2015	518
Xenopus laevis	972273000275008	104.94387	f	Ysterklip	-34.318964	19.118726	17.09.2015	Arabella 2	-34.321850	19.122907	05.09.2016	518
Xenopus laevis	972273000275980	78.3954	m	Ysterklip	-34.318964	19.118726	16.09.2015	Arabella 2	-34.321850	19.122907	16.10.2016	518
Xenopus laevis	972273000349070	57.65019	f	Arabella 2	-34.321850	19.122907	22.09.2015	Ysterklip	-34.318964	19.118726	03.05.2016	518
Xenopus laevis	972273000349284	55.04083	m	Arabella 2	-34.321850	19.122907	22.09.2015	Ysterklip	-34.318964	19.118726	03.04.2016	518
Xenopus laevis	972273000349960	50.76505	f	Arabella 2	-34.321850	19.122907	22.09.2015	Ysterklip	-34.318964	19.118726	01.02.2016	518
Xenopus laevis	900108001426369	85.69852	f	Lamloch	-34.330079	19.082633	28.09.2014	Lang gat	-34.326300	19.096403	18.08.2015	1360
Xenopus laevis	900108001909531	71.44829	m	Lamloch	-34.330079	19.082633	18.08.2015	Lang gat	-34.326300	19.096403	01.10.2016	1360
Xenopus laevis	900108001426369	85.69852	f	Lang gat	-34.326300	19.096403	18.08.2015	Lamloch	-34.330079	19.082633	19.08.2015	1360
Xenopus laevis	900108001909924	73.33939	f	Ysterklip	-34.318964	19.118726	13.10.2015	Horse 2	-34.330394	19.096690	09.11.2015	2420
